# Supplementary material for: Meta-analysis reveals that phenotypic plasticity and divergent selection promote reproductive isolation during incipient speciation
Source: Springer Nature journal article supplement (doi:10.1038/s41559-025-02687-7), 2025-05-07
Supplement: MOESM1 [file 41559_2025_2687_MOESM1_ESM.pdf]

# **Meta-analysis reveals that phenotypic plasticity and divergent selection promote reproductive isolation during incipient speciation**

---

In the format provided by the  
authors and unedited

## Supplementary Figures 1–5

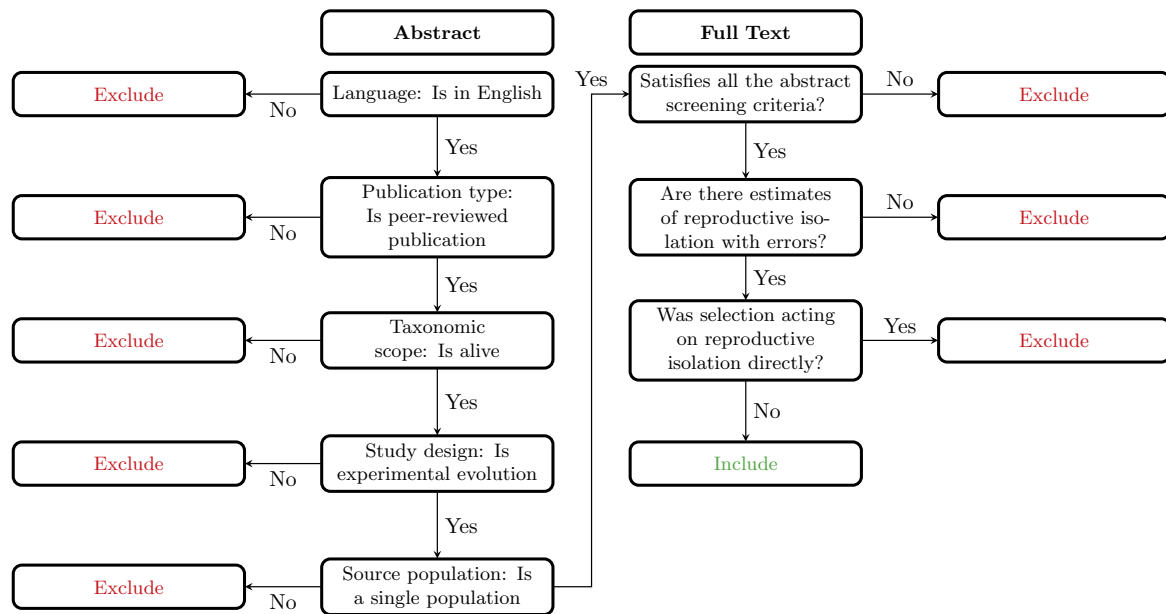

Supplementary Figure 1 | Decision tree for title and abstract screening, and full text screening.

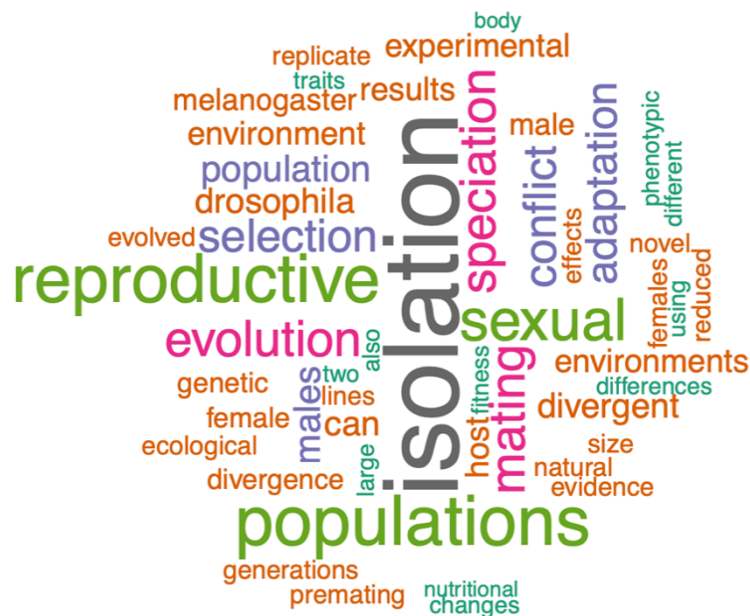

Supplementary Figure 2 | Word cloud formed from the title and abstracts of the 15 benchmarking papers (Supplementary Table 1). This guided our construction of search strings.

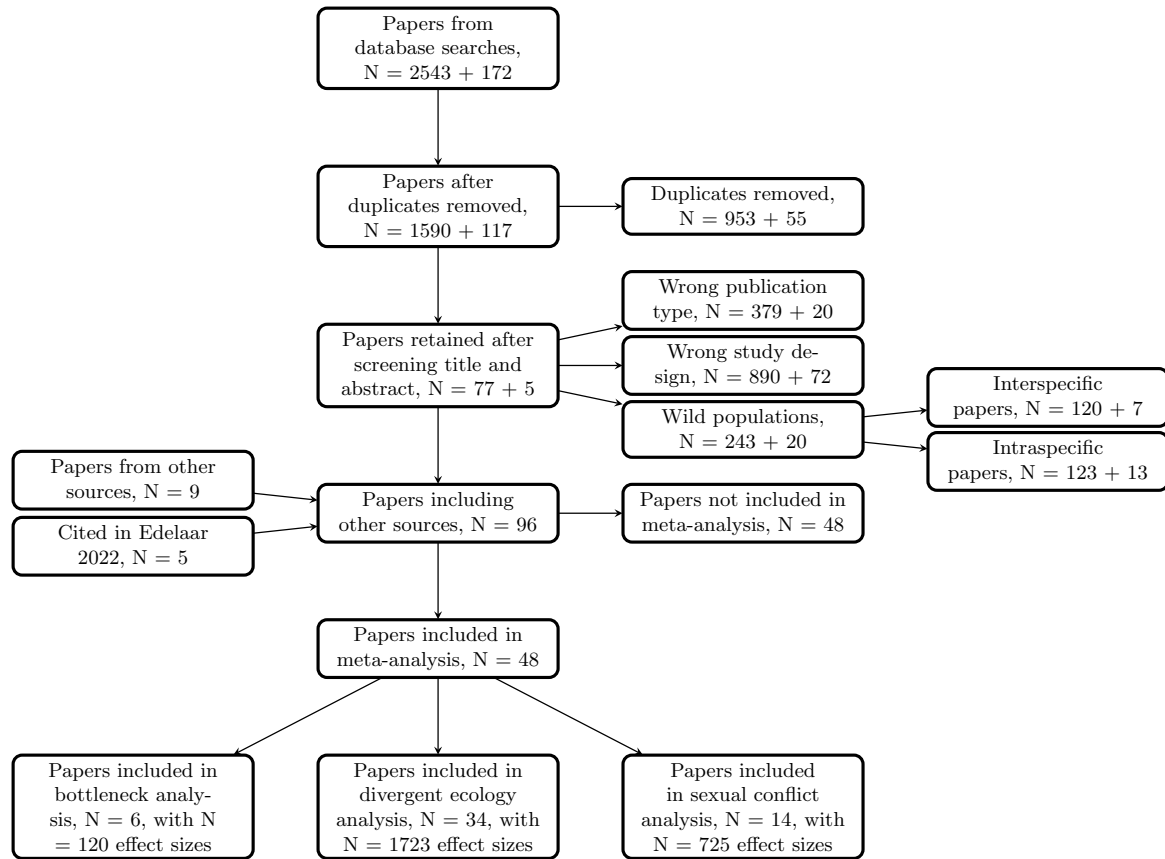

**Supplementary Figure 3 | PRISMA flow chart.** The two numbers in each block are from the two searches (the first in March 2021 at Lund University and the other in June 2023 at Bangor University). This manuscript covers only the results extracted from the middle block at the bottom “*Papers included in the divergent ecology analysis*”. The blocks either side are included for completeness.

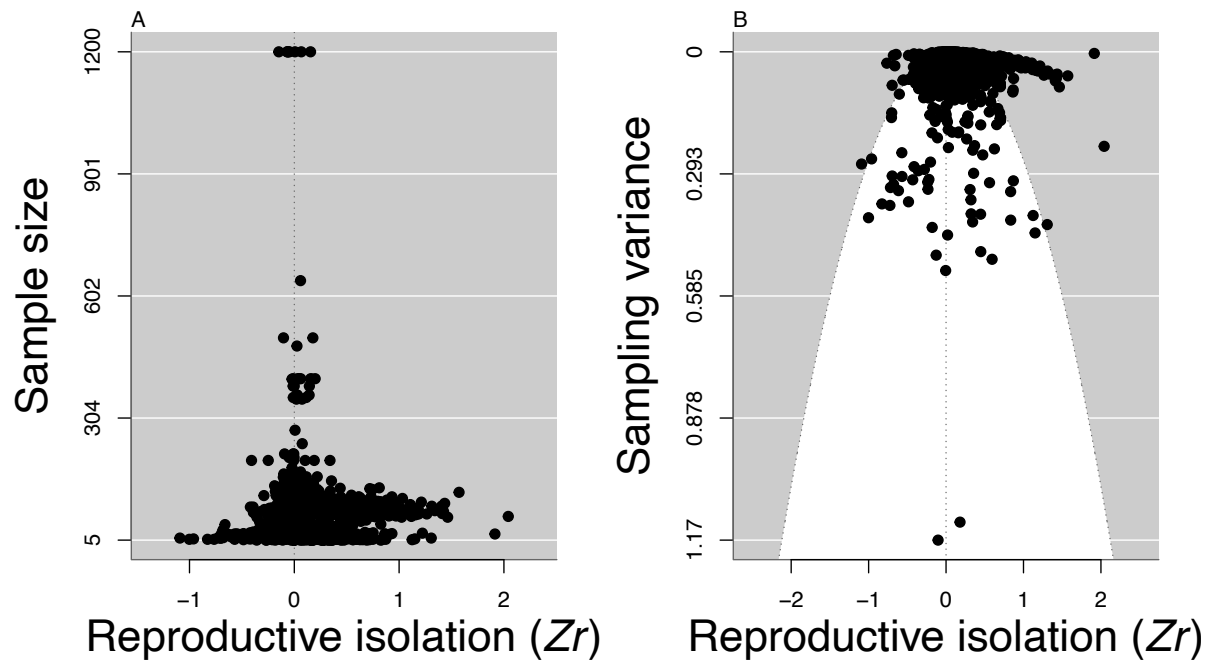

**Supplementary Figure 4 | Meta-analytic funnel plots.** The relationship between reproductive isolation and sample size (A) and reproductive isolation and sampling variance (B). Both plots show significant bias with skew to the right.

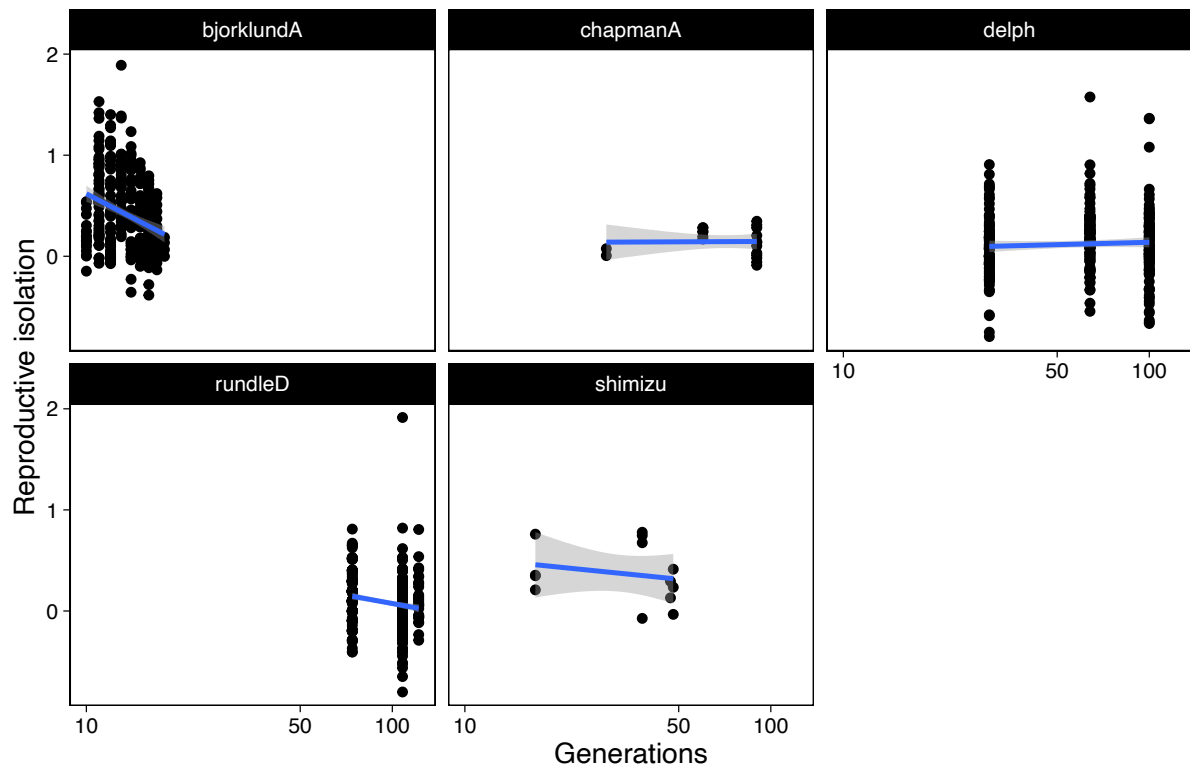

**Supplementary Figure 5 | Studies that have estimated reproductive isolation in the same populations in more than one generation.** Lines of best fit with standard errors as the grey shaded area are shown to illustrate the overall patterns of reproductive isolation over time for each study as they are estimated without any reference to the covariance between populations used more than once to produce reproductive isolation estimates, or without reference to precision of the data. The papers that contributed data to each panel are: bjorklundA<sup>100,101</sup>; chapmanA<sup>89,95</sup>; delph<sup>31</sup>; rundleD<sup>61</sup>; and shimizu<sup>93</sup>.

## Supplementary Tables 1–5

**Supplementary Table 1 | List of benchmarking papers used for our meta-analysis search.** All papers were found in our literature search.

| Authors           | Year | Paper title                                                                                                                                                                    | Journal                                |
|-------------------|------|--------------------------------------------------------------------------------------------------------------------------------------------------------------------------------|----------------------------------------|
| Rice              | 1996 | Sexually antagonistic male adaptation triggered by experimental arrest of female evolution                                                                                     | <i>Nature</i> 381, 232                 |
| Galiana et al.    | 1996 | Postmating isolation analysis in founder-flush experimental populations of <i>Drosophila pseudoobscura</i>                                                                     | <i>Evolution</i> 50, 941               |
| Rundle            | 2003 | Divergent environments and population bottlenecks fail to generate premating isolation in <i>Drosophila pseudoobscura</i>                                                      | <i>Evolution</i> 57, 2557              |
| Martin & Hosken   | 2003 | The evolution of reproductive isolation through sexual conflict                                                                                                                | <i>Nature</i> 423, 979                 |
| Wigby & Chapman   | 2006 | No evidence that experimental manipulation of sexual conflict drives premating reproductive isolation in <i>Drosophila melanogaster</i>                                        | <i>J. Evol. Biol.</i> 19, 1033         |
| Dettman et al.    | 2007 | Incipient speciation by divergent adaptation and antagonistic epistasis in yeast                                                                                               | <i>Nature</i> 447, 585                 |
| Hosken et al.     | 2009 | Sexual conflict and reproductive isolation in flies                                                                                                                            | <i>Biology Letters</i> 5, 697          |
| Kwan & Rundle     | 2010 | Adaptation to desiccation fails to generate pre- and post-mating isolation in replicate <i>Drosophila melanogaster</i> laboratory populations                                  | <i>Evolution</i> 64, 710               |
| Ghosh & Joshi     | 2012 | Evolution of reproductive isolation as a by-product of divergent life-history evolution in laboratory populations of <i>Drosophila melanogaster</i>                            | <i>Ecology &amp; Evolution</i> 2, 3214 |
| Matute            | 2013 | The role of founder effects on the evolution of reproductive isolation                                                                                                         | <i>J. Evol. Biol.</i> 26, 2299         |
| Arbuthnott et al. | 2014 | The ecology of sexual conflict: ecologically dependent parallel evolution of male harm and female resistance in <i>Drosophila melanogaster</i>                                 | <i>Ecology Letters</i> 17, 221         |
| Stojkovic et al.  | 2014 | Host-shift effects on mating behaviour and incipient pre-mating isolation in seed beetle                                                                                       | <i>Behavioural Ecology</i> 25, 553     |
| Castillo et al.   | 2015 | Experimental evolution: assortative mating and sexual selection, independent of local adaptation, lead to reproductive isolation in the nematode <i>Caenorhabditis remanei</i> | <i>Evolution</i> 69, 3141              |
| Villa et al.      | 2019 | Rapid experimental evolution of reproductive isolation from a single natural population                                                                                        | <i>PNAS</i> 116, 13440                 |
| Nash et al.       | 2019 | Mate choice and gene expression signatures associated with nutritional adaptation in the medfly ( <i>Ceratitis capitata</i> )                                                  | <i>Scientific Reports</i> 9, 1         |

**Supplementary Table 2 | Databases covered by Web of Science at the two universities where searches were performed.** The Scopus search only searched the Scopus database.

| <b>Institution</b> | <b>Databases covered by Web of Science</b>                                                                                                                                                                               |
|--------------------|--------------------------------------------------------------------------------------------------------------------------------------------------------------------------------------------------------------------------|
| Lund University    | Web of Science Core collection, BIOSIS Previews, CABI, Conference Proceedings, Emerging Sources Citation Index, FSTA, Korean Journal Database, MEDLINE, Russian Citation Index, SciELO Citation Index, Zoological Record |
| Bangor University  | Web of Science Core Collection, Biological Abstracts, BIOSIS Previews, Zoological Record, Current Contents Connect                                                                                                       |

**Supplementary Table 3 | The list of papers included in the divergent selection dataset, with details of the species used, the selection imposed, when (in generations) reproductive isolation was estimated, and the amount of data each has contributed to the dataset.** Two pairs of papers (indicated with the † and ‡ symbols) estimate reproductive isolation on the same populations. Full references numbers refer to the main reference list of the paper.

| Paper                            | Species                         | Source of selection                                                                       | Generations    | Number of effect sizes |
|----------------------------------|---------------------------------|-------------------------------------------------------------------------------------------|----------------|------------------------|
| Arbuthnott et al. <sup>82</sup>  | <i>Drosophila melanogaster</i>  | Diet (ethanol or cadmium)                                                                 | 219            | 56                     |
| Barerra et al. <sup>67</sup>     | <i>Drosophila melanogaster</i>  | Diet (cornstarch-yeast and heat shock or cornmeal and NaCl at constant temperature)       | 74, 108, 122   | 448                    |
| Belkina et al. <sup>83</sup>     | <i>Drosophila melanogaster</i>  | Diet (standard or starch or high salt)                                                    | 58, 103        | 17                     |
| Bérénos et al. <sup>84</sup>     | <i>Tribolium castaneum</i>      | Parasite (coevolution with <i>Nosema whitei</i> or no parasite)                           | 16             | 2                      |
| Boake et al. <sup>85</sup>       | <i>Drosophila melanogaster</i>  | Pesticide (DDT)                                                                           | 1100           | 1                      |
| Bordas et al. <sup>86</sup>      | <i>Gallus gallus</i>            | Artificial selection on residual feed consumption                                         | 16             | 3                      |
| Castillo et al. <sup>31</sup>    | <i>Caenorhabditis remanei</i>   | Diet ( <i>Escherichia coli</i> or <i>Bacillus subtilis</i> )                              | 30, 64, 100    | 331                    |
| Dargent et al. <sup>87</sup>     | <i>Poecilia reticulata</i>      | Ponds with or without predators                                                           | 8, 12          | 6                      |
| Dettman et al. <sup>88</sup>     | <i>Saccharomyces cerevisiae</i> | Diet (high salinity or low glucose)                                                       | 500            | 18                     |
| Dettman et al. <sup>89</sup>     | <i>Neurospora crassa</i>        | Diet/temperature (high salinity and high temperature or low salinity and low temperature) | 1362, 1589     | 4                      |
| Easty et al. <sup>90</sup>       | <i>Poecilia reticulata</i>      | Ponds with or without predators                                                           | 13, 26         | 2                      |
| Falk et al. <sup>91</sup>        | <i>Tribolium castaneum</i>      | Diet (wheat or corn flour)                                                                | 43             | 5                      |
| Fry <sup>92</sup>                | <i>Tetranychus urticae</i>      | Diet (host plant: tomato or bean)                                                         | 10             | 1                      |
| Fry <sup>25</sup>                | <i>Drosophila melanogaster</i>  | Diet (ethanol or regular)                                                                 | 120            | 6                      |
| Ghosh & Joshi <sup>93</sup>      | <i>Drosophila melanogaster</i>  | Development time (fast or normal)                                                         | 300            | 9                      |
| Kwan & Rundle <sup>94</sup>      | <i>Drosophila melanogaster</i>  | Diet (access to food and water)                                                           | 57             | 2                      |
| Leftwich et al. <sup>95</sup> †  | <i>Ceratitis capitata</i>       | Diet (starch or complex carbohydrates)                                                    | 29             | 2                      |
| Magalhães et al. <sup>96</sup>   | <i>Tetranychus urticae</i>      | Diet (host plant: cucumber, pepper or tomato)                                             | 25             | 211                    |
| Maklakov et al. <sup>97</sup>    | <i>Callosobruchus maculatus</i> | Age at reproduction (young or old)                                                        | 15, 18         | 4                      |
| Meffert & Regan <sup>98</sup>    | <i>Musca domestica</i>          | Artificial selection on courtship traits                                                  | 8              | 16                     |
| Miyatake & Shimizu <sup>99</sup> | <i>Zeugodacus cucurbitae</i>    | Development time (fast or slow)                                                           | 17, 38, 47, 48 | 13                     |
| Mooers et al. <sup>100</sup>     | <i>Drosophila melanogaster</i>  | Diet (regular or low pH)                                                                  | 21             | 51                     |
| Nash et al. <sup>101</sup> †     | <i>Ceratitis capitata</i>       | Diet (sucrose or starch)                                                                  | 60, 90         | 18                     |
| Rice <sup>102</sup>              | <i>Drosophila melanogaster</i>  | Female coevolution to males or not                                                        | 40             | 2                      |
| Robinson et al. <sup>103</sup>   | <i>Drosophila melanogaster</i>  | Age at reproduction (young or old)                                                        | 1500           | 30                     |
| Rodrigues et al. <sup>104</sup>  | <i>Tetranychus urticae</i>      | Female coevolution with <i>Wolbachia</i> -infected or uninfected males                    | 12             | 48                     |



|                                   |                                 |                                                       |                               |     |
|-----------------------------------|---------------------------------|-------------------------------------------------------|-------------------------------|-----|
| Rova & Björklund <sup>105</sup>   | <i>Callosobruchus maculatus</i> | Diet (black-eyed beans or mung beans)                 | 9                             | 2   |
| Rova & Björklund <sup>106,†</sup> | <i>Callosobruchus maculatus</i> | Diet (black-eyed beans or mung beans)                 | 10                            | 19  |
| Rova & Björklund <sup>107,†</sup> | <i>Callosobruchus maculatus</i> | Diet (black-eyed beans or mung beans)                 | 11, 12, 13, 14,<br>15, 16, 17 | 308 |
| Rundle <sup>32</sup>              | <i>Drosophila pseudoobscura</i> | Diet and temperature (banana at 21 or cornmeal at 25) | 15                            | 58  |
| Shenoi et al. <sup>72</sup>       | <i>Drosophila melanogaster</i>  | High or low larval density                            | 118                           | 8   |
| Stojković et al. <sup>108</sup>   | <i>Acanthoscelides obtectus</i> | Age at reproduction (young or old)                    | 155, 222                      | 12  |
| Stojković et al. <sup>73</sup>    | <i>Acanthoscelides obtectus</i> | Diet (host plant: bean or chick-pea)                  | 10                            | 8   |
| Villa et al. <sup>109</sup>       | <i>Columbicola columbae</i>     | Pigeon host (giant runt or feral pigeon)              | 60                            | 2   |

**Supplementary Table 4 | Results from publication bias and heterogeneity analyses performed using two statistical packages on the dataset without including any covariates.**

|               | R package | Model Parameters |                      | Heterogeneity (%)                 |                                     |                                    |                                    |
|---------------|-----------|------------------|----------------------|-----------------------------------|-------------------------------------|------------------------------------|------------------------------------|
|               |           | int              | slope                | I <sup>2</sup> <sub>species</sub> | I <sup>2</sup> <sub>phylogeny</sub> | I <sup>2</sup> <sub>research</sub> | I <sup>2</sup> <sub>residual</sub> |
| Egger's       | MCMCglmm  | 0.086            | 0.094<br>(p = 0.06)  | 1                                 | 1                                   | 10                                 | 88                                 |
|               | metafor   | 0.071            | 0.820<br>(p < 0.001) | 0                                 | 0                                   | 18                                 | 81                                 |
| Time-lag      | MCMCglmm  | -0.764           | 0.001<br>(p = 0.84)  | 2                                 | 1                                   | 10                                 | 87                                 |
|               | metafor   | 0.165            | -0.136<br>(p = 0.99) | 0                                 | 0                                   | 0                                  | 0                                  |
| Heterogeneity | MCMCglmm  | 0.103            | -                    | 2                                 | 1                                   | 7                                  | 90                                 |
|               | metafor   | 0.083            | -                    | 0                                 | 0                                   | 18                                 | 81                                 |

**Supplementary Table 5 | Results of the main model from “metafor”.** Table of coefficients for the main model, including the interaction between the barrier type and whether a common garden generation was used. Tests used were two-sided.

|                                            | estimate | se    | t-value | p-value | 95% CIs          |
|--------------------------------------------|----------|-------|---------|---------|------------------|
| Intercept                                  | -0.058   | 0.071 | -0.818  | 0.445   | [-0.232, 0.116]  |
| Between treatments                         | 0.072    | 0.014 | 5.024   | < 0.001 | [0.044, 0.101]   |
| Pre-mating barrier                         | 0.173    | 0.041 | 4.279   | < 0.001 | [0.094, 0.252]   |
| Common garden present                      | 0.023    | 0.062 | 0.377   | 0.707   | [-0.098, -0.145] |
| Number of generations                      | -0.000   | 0.000 | -0.216  | 0.829   | [-0.001, 0.001]  |
| Population-level data                      | 0.052    | 0.043 | 1.196   | 0.232   | [-0.033, 0.137]  |
| Backtransformed                            | -0.025   | 0.044 | -0.555  | 0.579   | [-0.112, 0.062]  |
| Founding population size (ln-transformed)  | -0.001   | 0.007 | -0.169  | 0.867   | [-0.015, 0.013]  |
| Pre-mating barrier : Common garden present | -0.130   | 0.061 | -2.121  | 0.034   | [-0.250, -0.010] |
